# Supplementary material
Source: publisher figshare collection journal article supplement (https://karger.figshare.com/ndownloader/files/29017170)
Supplement: Supplementary file 1 [file 29017170]

**Search term**

**Pubmed**

(("Hypertrophic cardiomyopathy"[Title] OR "familial Hypertrophic cardiomyopathy"[Title] OR "Hypertrophic obstructive cardiomyopathy"[Title] OR "HCM"[Title] OR "HOCM"[Title])) AND (female[Title/Abstract] OR woman[Title/Abstract] OR women[Title/Abstract] OR male[Title/Abstract] OR man[Title/Abstract] OR men[Title/Abstract] OR "gender"[Title/Abstract] OR "gender difference"[Title/Abstract]) AND ("Hypertrophic cardiomyopathy"[Title/Abstract] OR "familial Hypertrophic cardiomyopathy"[Title] OR "Hypertrophic obstructive cardiomyopathy"[Title])

1700

**Embase**

(hcm OR hocm OR 'hypertrophic cardiomyopathy'/exp OR 'hypertrophic cardiomyopathy' OR 'familial hypertrophic cardiomyopathy'/exp OR 'familial hypertrophic cardiomyopathy' OR 'hypertrophic obstructive cardiomyopathy'/exp OR 'hypertrophic obstructive cardiomyopathy’) AND (‘gender’/exp OR ‘gender difference’/exp OR “gender difference”)
